# Supplementary material for: 18-HEPE, an n-3 fatty acid metabolite released by macrophages, prevents pressure overload–induced maladaptive cardiac remodeling
Source: PubMed Central journal article supplement — J Exp Med. 2014 Jul 28;211(8):1673–87. doi: 10.1084/jem.20132011 (PMC4113943; doi:10.1084/jem.20132011), 2014-07-28
Supplement: supp_jem.20132011_JEM_20132011_sm.pdf [file supp_jem.20132011_JEM_20132011_sm.pdf]

## SUPPLEMENTAL MATERIAL

Endo et al., <http://www.jem.org/cgi/content/full/jem.20132011/DC1>**Table S1.** PCR primers

| Gene symbol | Forward primer (5'-3')  | Reverse primer (5'-3')  |
|-------------|-------------------------|-------------------------|
| Rn18S       | TGGTTGCAAAGCTGAACTTAAAG | AGTCAAATTAAGCCGAGGC     |
| Nppa        | GGAGCCTACGAAGATCCAGC    | TCCAATCCTGTCAATCCTACCC  |
| Nppb        | GAGGTCACTCTATCTCTGG     | GCCATTTCTCCGACTTTTCTC   |
| Il6         | CTGCAAGAGACTTCCATCCAG   | AGTGGTATAGACAGGTCTGTTGG |
| Il4         | GGTCTCAACCCCAAGTAGT     | GCCGATGATCTCTCAAGTGAT   |
| Tgfb1       | CTCCCGTGGCTTCTAGTGC     | GCCTTAGTTGGACAGGATCTG   |
| Col1a1      | CCCTGGCCTGGAGGAA        | CACGGAACTCCAGCTGATTTT   |
| Col3a1      | TCCCCTGGAATCTGTGAATC    | TGAGTCGAATTGGGGAGAAT    |
| Ccl2        | TAAAAACCTGGATCGGAACCAAA | GCATTAGCTTCAGATTACGGGT  |
| Ptgs2       | TGAGCAACTATTCCAAACCAGC  | GCACGTAGTCTTCGATCACTATC |
| Chi3l3      | CAGGTCTGGCAATTCTCTGAA   | GTCTTGCTCATGTGTGTAAGTGA |
| Retnla      | CCAATCCAGCTAACTATCCCTCC | ACCCAGTAGCAGTCATCCCA    |
| Nos2        | ACATCGACCCGTCACAGTAT    | CAGAGGGGTAGGCTTGTCTC    |
| alox15      | GGCTCCAACAACGAGGTCTAC   | AGGTATTCTGACACATCCACCTT |
| Tnf         | CAGGCGGTGCCTATGTCTC     | CGATCACCCCGAAGTTCAGTAG  |
| Arginase1   | CTCCAAGCCAAAGTCCTTAGAG  | AGGAGCTGTCATTAGGGACATC  |
| Il1b        | GCAACTGTTCTGAACTCAACT   | ATCTTTGGGGTCCGTCAACT    |
| Cx3cl1      | ACGAAATGCGAAATCATGTGC   | CTGTGTCGTCTCCAGGACAA    |
| Emr1        | TGACTCACCTTGTGGTCTAA    | CTCCCGAATCCAGTCTTTCC    |
